# Supplementary material for: Slow-light enhanced photocatalytic water splitting over Cu-incorporated 3D ordered macroporous ZIF-8
Source: Royal Society of Chemistry journal article supplement (doi:10.1039/d5ta08820h), 2026-01-01
Supplement: d5ta08820h1.pdf [file d5ta08820h1.pdf]

## **Slow-Light Enhanced Photocatalytic Water Splitting over Cu-Incorporated 3D Ordered Macroporous ZIF-8**

*Junzhou Men*<sup>a</sup>, *Zeyu Wang*<sup>a</sup>, *Chen Luo*<sup>a</sup>, *Ai Zhang*<sup>a</sup>, *Hui Xian*<sup>c</sup>, *Tao Jiang*<sup>a,\*</sup>,  
*Yating Wang*<sup>a,b,\*</sup>

<sup>a</sup> Tianjin Key Laboratory of Brine Chemical Engineering and Resource Eco-utilization, Tianjin Key Laboratory of Multiplexed Identification for Port Hazardous Chemicals, School of Chemical Engineering and Material Science, Tianjin University of Science & Technology, Tianjin 300457, P. R. China.

<sup>b</sup> National Engineering Research Center of Distillation Technology, Collaborative Innovation Center of Chemical Science and Engineering (Tianjin), School of Chemical Engineering and Technology, Tianjin University, Tianjin 300072, P. R. China.

<sup>c</sup> School of Continuing Education, Tiangong University, Tianjin 300387, P. R. China.

\*Corresponding author: [wangyating@tust.edu.cn](mailto:wangyating@tust.edu.cn); [jiangtao@tust.edu.cn](mailto:jiangtao@tust.edu.cn)

## Catalogue

|                                                                                                                                                                                             |    |
|---------------------------------------------------------------------------------------------------------------------------------------------------------------------------------------------|----|
| <b>Fig. S1</b> The SEM image of Cu-3D-ZIF-248 with reduced PS template content (RCu-3D-ZIF-8-248) was magnified by 10000 times.....                                                         | 3  |
| <b>Fig. S2</b> (A) The pore size distribution and(B) N <sub>2</sub> adsorption-desorption isotherms of as-prepared samples. ....                                                            | 3  |
| <b>Fig. S3</b> The element mapping of Cu-3D-ZIF-325.....                                                                                                                                    | 4  |
| <b>Fig. S4</b> The efficiencies of hydrogen generation over Cu-3D-ZIF-248 and RCu-3D-ZIF-248 under simulated sunlight irradiation .....                                                     | 4  |
| <b>Table S1</b> The weight loss of as-prepared samples in TG.....                                                                                                                           | 5  |
| <b>Table S2</b> The PS diameter, pore size and shrinkage. ....                                                                                                                              | 5  |
| <b>Table S3</b> The specific surface area and pore structure of the samples. ....                                                                                                           | 5  |
| <b>Table S4</b> The proportions of various elements in the XPS survey spectrum of as-prepared samples .....                                                                                 | 5  |
| <b>Table S5</b> The peak proportion of C 1s XPS spectra of as-prepared samples.....                                                                                                         | 5  |
| <b>Table S6</b> The peak proportion of N 1s XPS spectra of as-prepared samples. ....                                                                                                        | 6  |
| <b>Table S7</b> The peak proportion of O 1s XPS spectra of as-prepared samples. ....                                                                                                        | 6  |
| <b>Table S8</b> The peak proportion of Zn 2p XPS spectra of as-prepared samples. ....                                                                                                       | 6  |
| <b>Table S9</b> The peak proportion of Cu 2p XPS spectra of as-prepared samples. ....                                                                                                       | 6  |
| <b>Table S10</b> The apparent quantum efficiency of the sample.....                                                                                                                         | 6  |
| <b>Table S11</b> The kinetic constants extracted from the time-resolved PL decay curves of samples Cu-ZIF, ZIF, Cu-3D-ZIF-325, Cu-3D-ZIF-248 and 3D-ZIF-325 were calculated by fitting. ... | 6  |
| <b>Table S12</b> Previously reported photocatalytic hydrogen evolution performance and apparent quantum efficiency (AQE) of advanced MOF-based photocatalysts. ....                         | 7  |
| <b>Table S13</b> The photocatalytic hydrogen evolution performance and apparent quantum efficiency (AQE) of advanced photocatalysts have been previously reported. ....                     | 7  |
| <b>Table S14</b> The diameters of PS spheres, the pore diameter and the photonic band gap positions measured by reflectance spectra and calculated by the modified Bragg's law.....         | 8  |
| <b>Introduction to DFT calculations</b> .....                                                                                                                                               | 8  |
| <b>Reference</b> .....                                                                                                                                                                      | 10 |

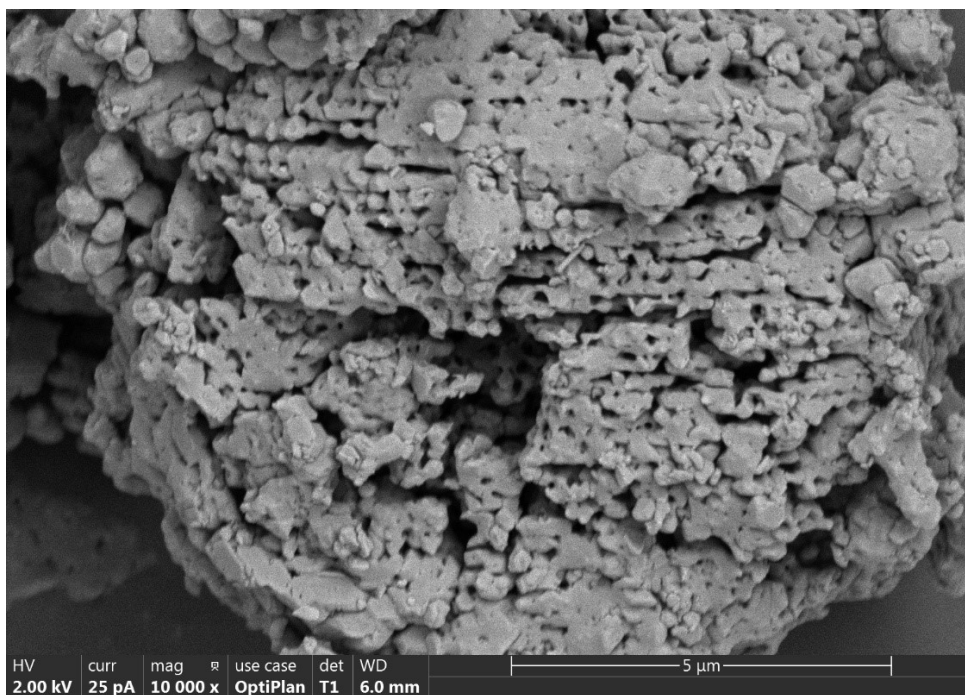

**Fig. S1** The SEM image of Cu-3D-ZIF-248 with reduced PS template content (RCu-3D-ZIF-8-248) was magnified by 10000 times.

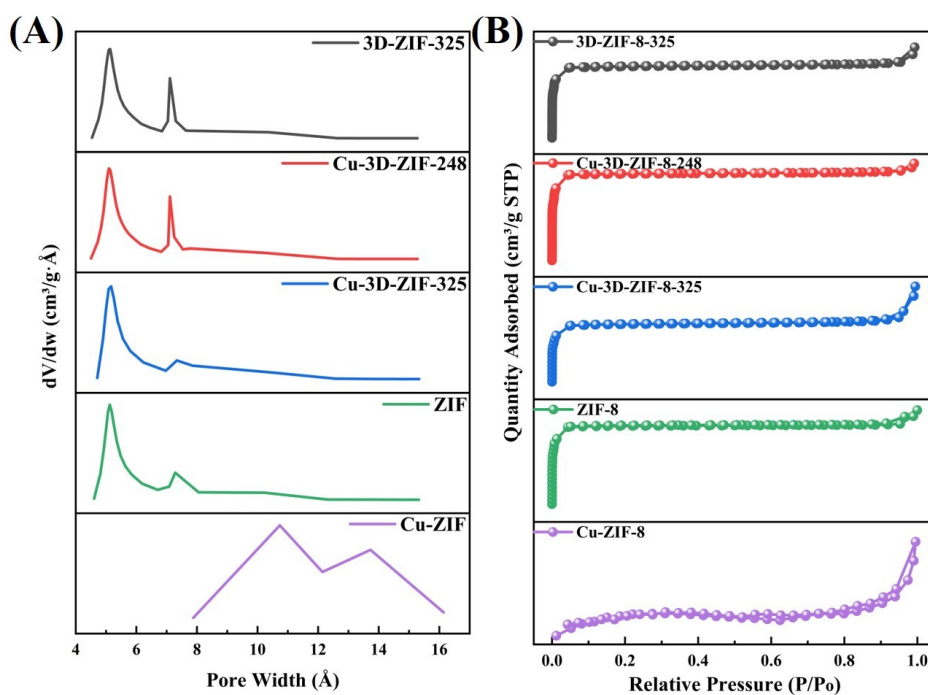

**Fig. S2** (A) The pore size distribution and (B) N<sub>2</sub> adsorption-desorption isotherms of as-prepared samples.

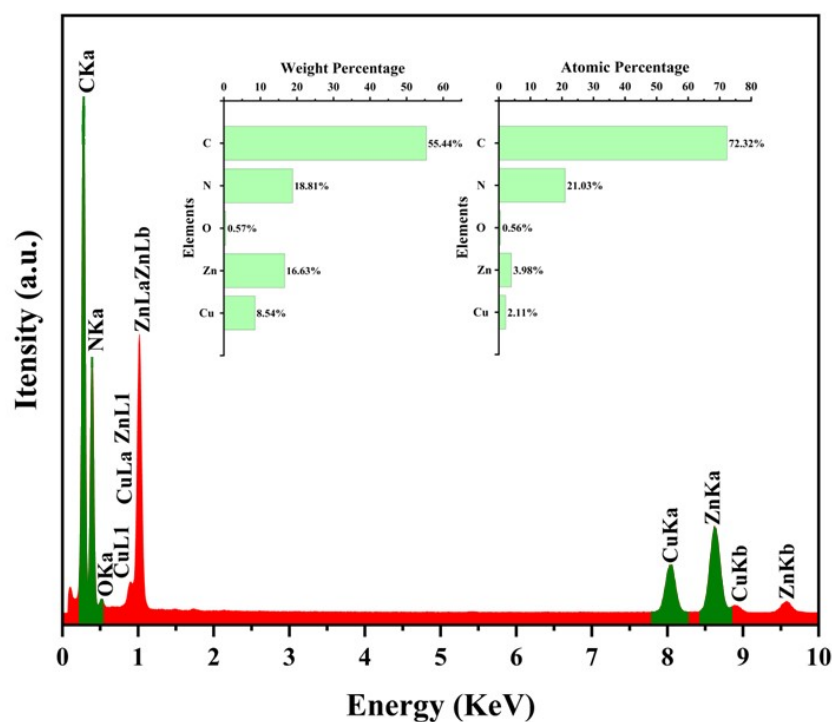

Fig. S3 The element mapping of Cu-3D-ZIF-325.

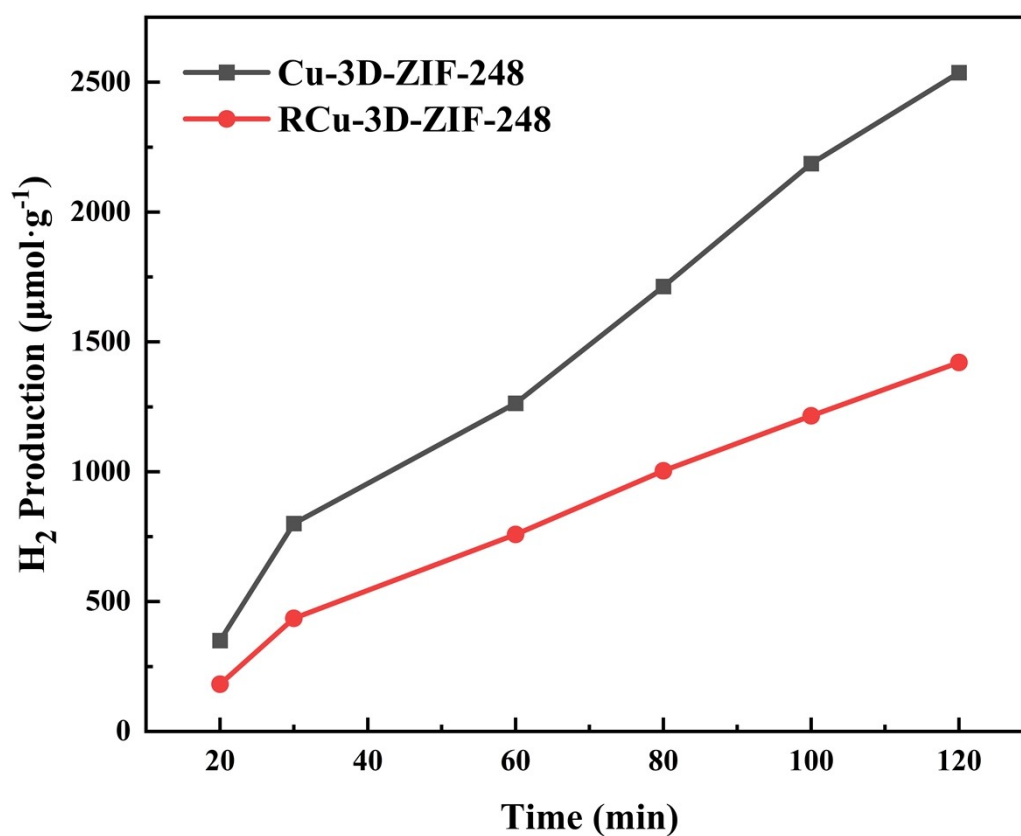

Fig. S4 The efficiencies of hydrogen generation over Cu-3D-ZIF-248 and RCu-3D-ZIF-248 under simulated sunlight irradiation

**Table S1** The weight loss of as-prepared samples in TG.

| Weight loss (%) | Cu-ZIF | ZIF   | Cu-3D-ZIF-325 | Cu-3D-ZIF-248 | 3D-ZIF-325 |
|-----------------|--------|-------|---------------|---------------|------------|
| Stage I         | 18.54  | 4.14  | 6.93          | 4.93          | 8.64       |
| Stage II        | 4.98   | 5.80  | 8.76          | 7.80          | 8.52       |
| Stage III       | 48.11  | 55.63 | 49.94         | 55.62         | 51.17      |
| Residual mass   | 27.37  | 34.43 | 34.47         | 32.25         | 31.67      |

**Table S2** The PS diameter, pore size and shrinkage.

| Sample name   | Template diameter ( nm ) | Average pore size ( nm ) | Shrinkage rate % |
|---------------|--------------------------|--------------------------|------------------|
| Cu-3D-ZIF-248 | 248                      | 221                      | 10.89            |
| Cu-3D-ZIF-325 | 325                      | 315                      | 3.1              |
| 3D-ZIF-325    | 325                      | 312                      | 4                |

**Table S3** The specific surface area and pore structure of the samples.

| samples                                     | Cu-ZIF | ZIF     | Cu-3D-ZIF-325 | Cu-3D-ZIF-248 | 3D-ZIF-325 |
|---------------------------------------------|--------|---------|---------------|---------------|------------|
| pore diameter (Å)                           | 35.99  | 16.29   | 17.33         | 16.42         | 17.26      |
| Average pore size of mesopores (Å)          | 57.39  | 131.06  | 246.93        | 109.17        | 143.47     |
| micropore volume (cm <sup>3</sup> /g)       | 0.00   | 0.06    | 0.33          | 0.64          | 0.56       |
| Mesoporous pore volume (cm <sup>3</sup> /g) | 0.00   | 0.40    | 0.06          | 0.04          | 0.06       |
| total pore volume (cm <sup>3</sup> /g)      | 0.00   | 0.46    | 0.39          | 0.68          | 0.62       |
| specific surface area (m <sup>2</sup> /g)   | 1.15   | 1141.39 | 896.05        | 1660.78       | 1441.75    |

**Table S4** The proportions of various elements in the XPS survey spectrum of as-prepared samples

| Samples       | C/at% | N/at% | O/at% | Zn/at% | Cu/at% |
|---------------|-------|-------|-------|--------|--------|
| Cu-ZIF        | 58.87 | 27.82 | 6.29  | 6.81   | 0.22   |
| ZIF           | 58.21 | 28.19 | 5.79  | 7.81   | --     |
| Cu-3D-ZIF-325 | 60.87 | 26.94 | 4.64  | 7.31   | 0.24   |
| Cu-3D-ZIF-248 | 64.25 | 24.32 | 5.10  | 6.13   | 0.20   |
| 3D-ZIF-325    | 61.81 | 27.03 | 4.18  | 6.98   | --     |

**Table S5** The peak proportion of C 1s XPS spectra of as-prepared samples.

| Samples       | Peak position (eV) |        |        | Peak area ratio (%) |        |        |
|---------------|--------------------|--------|--------|---------------------|--------|--------|
|               | C-O                | C-N    | C=C    | C-O                 | C-N    | C=C    |
| Cu-ZIF        | 291.80             | 286.00 | 284.70 | 3.95%               | 28.34% | 67.71% |
| ZIF           | 291.81             | 286.02 | 284.71 | 3.89%               | 30.53% | 65.58% |
| Cu-3D-ZIF-325 | 291.81             | 286.01 | 284.72 | 3.23%               | 26.03% | 70.74% |
| Cu-3D-ZIF-248 | 291.80             | 286.00 | 284.71 | 3.66%               | 24.32% | 72.02% |
| 3D-ZIF-325    | 291.81             | 286.02 | 284.70 | 2.96%               | 28.18% | 68.87% |

**Table S6** The peak proportion of N 1s XPS spectra of as-prepared samples.

| Samples       | Peak position (eV) |        | Peak area ratio (%) |        |
|---------------|--------------------|--------|---------------------|--------|
|               | N-Zn/Cu            | C-N    | N-Zn/Cu             | C-N    |
| Cu-ZIF        | 400.40             | 398.70 | 6.57%               | 93.43% |
| ZIF           | 400.42             | 398.73 | 4.18%               | 95.82% |
| Cu-3D-ZIF-325 | 400.41             | 398.72 | 5.47%               | 94.53% |
| Cu-3D-ZIF-248 | 400.43             | 398.87 | 8.33%               | 91.67% |
| 3D-ZIF-325    | 400.40             | 398.71 | 6.83%               | 93.17% |

**Table S7** The peak proportion of O 1s XPS spectra of as-prepared samples.

| Samples       | Peak position (eV) |        | Peak area ratio (%) |        |
|---------------|--------------------|--------|---------------------|--------|
|               | O-H                | C-O    | O-H                 | C-O    |
| Cu-ZIF        | 531.95             | 531.15 | 43.32%              | 56.68% |
| ZIF           | 531.95             | 531.15 | 40.71%              | 59.29% |
| Cu-3D-ZIF-325 | 531.94             | 531.15 | 40.63%              | 59.37% |
| Cu-3D-ZIF-248 | 531.29             | 531.07 | 39.00%              | 61.00% |
| 3D-ZIF-325    | 531.94             | 531.16 | 40.49%              | 59.51% |

**Table S8** The peak proportion of Zn 2p XPS spectra of as-prepared samples.

| Samples       | Peak position (eV) |                   | Peak area ratio (%) |                   |
|---------------|--------------------|-------------------|---------------------|-------------------|
|               | 2p <sub>1/2</sub>  | 2p <sub>3/2</sub> | 2p <sub>1/2</sub>   | 2p <sub>3/2</sub> |
| Cu-ZIF        | 1044.80            | 1021.72           | 33.32%              | 66.68%            |
| ZIF           | 1044.81            | 1021.72           | 33.33%              | 66.67%            |
| Cu-3D-ZIF-325 | 1044.82            | 1021.72           | 33.34%              | 66.66%            |
| Cu-3D-ZIF-248 | 1044.82            | 1021.70           | 33.33%              | 66.67%            |
| 3D-ZIF-325    | 1044.81            | 1021.72           | 33.30%              | 66.70%            |

**Table S9** The peak proportion of Cu 2p XPS spectra of as-prepared samples.

| Samples       | Peak position (eV) |                   | Peak area ratio (%) |                   |
|---------------|--------------------|-------------------|---------------------|-------------------|
|               | 2p <sub>1/2</sub>  | 2p <sub>3/2</sub> | 2p <sub>1/2</sub>   | 2p <sub>3/2</sub> |
| Cu-ZIF        | 953.90             | 933.11            | 33.34%              | 66.66%            |
| Cu-3D-ZIF-325 | 953.90             | 933.13            | 33.33%              | 66.67%            |
| Cu-3D-ZIF-248 | 953.49             | 933.46            | 33.33%              | 66.67%            |

**Table S10** The apparent quantum efficiency of the sample

| Sample                      | Cu-ZIF | ZIF  | Cu-3D-ZIF-325 | Cu-3D-ZIF-248 | 3D-ZIF-325 |
|-----------------------------|--------|------|---------------|---------------|------------|
| Apparent quantum efficiency | 3.17   | 0.40 | 11.72         | 6.77          | 0.43       |

**Table S11** The kinetic constants extracted from the time-resolved PL decay curves of samples Cu-ZIF, ZIF, Cu-3D-ZIF-325, Cu-3D-ZIF-248 and 3D-ZIF-325 were calculated by fitting.

| Samples       | $\tau_1$ (ns) | Rel <sub>1</sub> (%) | $\tau_2$ (ns) | Rel <sub>2</sub> (%) | $\tau_{(avg)}$ (ns) |
|---------------|---------------|----------------------|---------------|----------------------|---------------------|
| Cu-ZIF        | 2.56          | 69.64                | 19.49         | 30.36                | 7.70                |
| ZIF           | 1.75          | 71.13                | 4.02          | 28.87                | 2.41                |
| Cu-3D-ZIF-325 | 1.39          | 58.20                | 5.79          | 41.80                | 3.23                |
| Cu-3D-ZIF-248 | 1.61          | 59.97                | 6.72          | 40.03                | 3.65                |
| 3D-ZIF-325    | 1.96          | 63.88                | 5.94          | 36.12                | 3.39                |

**Table S12** Previously reported photocatalytic hydrogen evolution performance and apparent quantum efficiency (AQE) of advanced MOF-based photocatalysts.

| Samples                                         | H <sub>2</sub> Production Rate (umol·g <sup>-1</sup> ·h <sup>-1</sup> ) |
|-------------------------------------------------|-------------------------------------------------------------------------|
| Pd@MOF-808-b [1]                                | 236                                                                     |
| Cu-MOF/ZnIn <sub>2</sub> S <sub>4</sub> -10 [2] | 300                                                                     |
| PbS/NTU-9 [3]                                   | 432                                                                     |
| Fe-MOF-525 [4]                                  | 505.4                                                                   |
| MoS <sub>2</sub> @Cu/Co-MOF [5]                 | 832.4                                                                   |
| Co-MOF/H-g-C <sub>3</sub> N <sub>4</sub> [6]    | 1033                                                                    |
| ZrO <sub>2</sub> /Zr-MOF/Pt [7]                 | 1327                                                                    |
| ZCS@Cu <sub>0.75</sub> /Fe-MOF [8]              | 1563.96                                                                 |
| this work                                       | 2233.20                                                                 |

**Table S13** The photocatalytic hydrogen evolution performance and apparent quantum efficiency (AQE) of advanced photocatalysts have been previously reported.

| Samples                                                 | H <sub>2</sub> Production Rate (umol·g <sup>-1</sup> ·h <sup>-1</sup> ) | Apparent quantum efficiency (%) | Wavelength (nm) |
|---------------------------------------------------------|-------------------------------------------------------------------------|---------------------------------|-----------------|
| Co-Co PBA/GDY [9]                                       | 96.93                                                                   | 1.94                            | 470             |
| CdS/MoC[10]                                             | 224.5                                                                   | 7.6                             | 420             |
| Na-SPHI [11]                                            | 571.8                                                                   | 61.7                            | 420             |
| g-C <sub>3</sub> N <sub>4</sub> (CN <sub>3</sub> ) [12] | 1160                                                                    | 7.67                            | 420             |
| CuPtAu/g-C <sub>3</sub> N <sub>4</sub> [13]             | 1451                                                                    | 4.9                             | 370             |
| CoS/g-C <sub>3</sub> N <sub>4</sub> /NiS[14]            | 1930                                                                    | 16.4                            | 420             |
| This work                                               | 2233.20                                                                 | 11.72                           | 400             |

In this study, Cu<sup>2+</sup> doping achieves a significant amplification of the slow light effect by precisely regulating the refractive index ( $n$ ) and photonic band gap (PBG) characteristics of 3DOM ZIF-8, with the underlying mechanism elaborated as follows:

Firstly, Cu<sup>2+</sup> doping effectively increase the dielectric constant ( $\epsilon$ ) of the ZIF-8 solid phase This is attributed to the partial substitution of Zn<sup>2+</sup> by Cu<sup>2+</sup> in the ZIF-8 lattice, where Cu<sup>2+</sup> forms a stable coordination environment. For non-magnetic materials, the refractive index and dielectric constant follow the relationship  $n = \sqrt{\mu\epsilon}$  (where  $\mu$  is the magnetic permeability, approximately a constant), leading to a direct increase in the refractive index ( $n$ ) of the ZIF-8 solid phase upon Cu<sup>2+</sup> doping. The enhanced  $n$  significantly promotes multiple scattering and total internal reflection of light within the 3DOM macropores, prolonging the light residence time inside the catalyst and thereby amplifying the slow light effect.

Secondly, Cu<sup>2+</sup> doping modulates the PBG position by increasing  $n$ . The PBG can be easily calculated according to the modified Bragg's law (Chem, 2 (2017) 877-892.):

$$\lambda = 2 \sqrt{\frac{2}{3}} D \sqrt{n_{ZIF-8}^2 f + n_{void}^2 (1 - f) - \sin^2 \theta}$$

$\lambda$  is the wavelength associated with the photonic band gap,  $D$  is the macropore diameter of 3DOM ZIF-8 (Table S2),  $n$  is the refractive index;  $f$  is the volume fraction of ZIF-8, typically taken as 0.4;  $\theta$  is the incident angle of light.

When  $\theta = 0^\circ$ , the PBG wavelength ( $\lambda$ ) depends exclusively on the macropore diameter ( $D$ ) and the effective refractive index of 3DOM ZIF-8. Notably, the measured PBG wavelength ( $\lambda_{\text{measured}}$ ) from reflection spectra exhibits excellent agreement with the calculated value ( $\lambda_{\text{calculated}}$ ) using the modified Bragg's law. As indicated by the equation, a larger macropore diameter ( $D$ ) or higher refractive index ( $n$ ) results in a longer PBG wavelength, thereby expanding the PBG range. Thus, the enhancement of  $n$  induced by  $\text{Cu}^{2+}$  doping further promotes the expansion of the PBG.

In summary,  $\text{Cu}^{2+}$  doping enhances the solid-phase refractive index by increasing the dielectric constant of ZIF-8, which strengthens light scattering and extends the optical path length. Consequently, the slow light effect of Cu-3D-ZIF-325 is significantly superior to that of pristine 3D-ZIF-8, ultimately leading to substantial improvements in light harvesting efficiency and photocatalytic hydrogen evolution activity.

**Table S14** The diameters of PS spheres, the pore diameter and the photonic band gap positions measured by reflectance spectra and calculated by the modified Bragg's law.

| Sample name   | PS diameter<br>(nm) | Pore diameter<br>(nm) | Shrinkage % | $\lambda_{\text{measured}}$ | $\lambda_{\text{calculated}}$ |
|---------------|---------------------|-----------------------|-------------|-----------------------------|-------------------------------|
| Cu-3D-ZIF-248 | 248                 | 221                   | 10.89       | 559                         | 562                           |
| Cu-3D-ZIF-325 | 325                 | 315                   | 3.1         | 592                         | 588                           |

## Introduction to DFT calculations

All theoretical calculations were performed using the Vienna Ab-initio Simulation Package (VASP). The electron exchange-correlation interactions were described by the generalized gradient approximation (GGA) combined with the Perdew-Burke-Ernzerhof (PBE) potential. The electronic wave functions were



expanded using a plane-wave basis set with a cutoff energy of 520 eV, and the interlayer van der Waals interactions were corrected via Grimme's DFT-D3 method. For k-point sampling in the first Brillouin zone, the  $\Gamma$ -centered Monkhorst-Pack scheme was adopted with a grid setting of  $2 \times 2 \times 1$ . The convergence criteria for structural optimization were set as follows: the force acting on each atom in the model was less than  $0.03 \text{ eV} \cdot \text{\AA}^{-1}$ , and the total energy of the system converged to  $10^{-5} \text{ eV}$ . Meanwhile, to avoid spurious interactions between periodic repeating units, a vacuum layer larger than  $15 \text{ \AA}$  was set along the z-direction (crystallographic direction), a treatment widely employed in the local structural simulation of porous framework materials. In the DFT calculations, the structural model of ZIF-8 was directly taken from the experimentally reported unit cell without further simplification, with lattice constants of  $16.99 \text{ \AA} \times 16.99 \text{ \AA} \times 16.99 \text{ \AA}$ . This unit cell was fully optimized and served as the basis for constructing the calculation model. To balance the approximate simulation of the local environment of the 3DOM framework and computational feasibility, a slab model was built based on this optimized unit cell. The resulting structure is consistent with the modeling strategies reported in recent studies on 3DOM ZIF-8 frameworks, and this periodic repeating fragment can provide reliable and physically meaningful characterization of local structural features for the adsorption and reaction analyses involved in this work.

## Reference

- [1] J. Xu, J. Liu, Z. Li, X. Wang, Z.J.J.o.M.S. Wang, Synthesis, structure and properties of Pd@ MOF-808, *J. Mater. Sci*, 54 (2019) 12911-12924.
- [2] H. Chen, J. Wu, Y. Zhu, J. Yang, B. Tang, T. Zhang, H.J.R.E. Yang, Cu-MOF modified ZnIn<sub>2</sub>S<sub>4</sub> nanosheet composite catalyst for photocatalytic hydrogen production, *Renewable Energy*, 228 (2024) 120672.
- [3] R. Kaur, V.A. Chhabra, A. Rana, R.K. Singh, S. Tripathi, K.-H. Kim, A.J.I.J.o.H.E. Deep, QD/MOF nanocomposites as novel photoanode for photocatalytic and photovoltaic applications, *Int. J. Hydrog. Energy*, 107 (2025) 63-73.
- [4] Y. Wu, Y. Qu, C. Su, X. Yang, Y. Yang, Y. Zhang, W.J.I.C. Huang, Enhanced photoinduced carrier separation in Fe-MOF-525/CdS for photocatalytic hydrogen evolution: improved catalytic dynamics with specific active sites, *Inorg. Chem*, 62 (2023) 21290-21298.
- [5] D. Masekela, T.L. Yusuf, S.A. Balogun, E. Makhado, O.I. Adeniran, K.D.J.J.o.A. Modibane, Compounds, Interfacial engineering of MoS<sub>2</sub> and bimetallic MOF hybrid for superior piezo-photocatalytic hydrogen production and wastewater treatment, *J. Alloy. Compd*, 1020 (2025) 179304.
- [6] Z. Liu, J. Xu, T. Xue, X. Liu, S. Xu, Z.J.N.J.o.C. Li, Hydrogen evolution performance of Co-MOF/Hg-C<sub>3</sub>N<sub>4</sub> composite catalysts with different morphologies under visible light, *New J. Chem*, 47 (2023) 3703-3713.
- [7] W.W. Cheng, S.N. Zhang, J. Wang, J. Yang, Z. Yang, X.F. Chen, J.D. Xiao, J.J.C.A.E.J. Wang, Boosting Hydrogen Production of a MOF-based Multicomponent Photocatalyst with Clean Interface via Facile One-pot Electrosynthesis, *Chem. Eur J*, 30 (2024) e202303886.
- [8] B. Zhao, J. Liu, Y. Liu, W. Wen, Z.J.J.o.A. Li, Compounds, In situ growth of ZnCdS nanoparticles on bimetallic Cu/Fe-MOF for efficient visible-light-driven photocatalytic hydrogen production and urea synthesis, *J. Alloy. Compd*, 1011 (2025) 178395.
- [9] K. Wang, M. Wang, H. Xie, S. Li, X. Kong, Z.J.S. Jin, P. Technology, Rational construction of graphdiyne (g-C<sub>n</sub>H<sub>2n-2</sub>) coupling with Co-Co PBA S-scheme heterojunctions for efficient photocatalytic hydrogen production, *Sep. Purif. Technol.*, 322 (2023) 124286.
- [10] Y. Lei, X. Wu, S. Li, J. Huang, K.H. Ng, Y.J.J.o.C.P. Lai, Noble-metal-free metallic MoC combined with CdS for enhanced visible-light-driven photocatalytic hydrogen evolution, *J. Clean. Prod.*, 322 (2021) 129018.
- [11] Y. Li, D. Ge, H. Zhang, L. Shangguan, Z. Mou, F. Xia, J. Sun, X. Liu, Y. Su, W.J.S. Lei, Solvated Electrons Generated on the Surface of Na-SPHI for Boosting Visible Light Photocatalytic Hydrogen Evolution with Ultra-High AQE, *Small*, 20 (2024) 2401392.
- [12] J. Huang, Y. Cao, H. Wang, H. Yu, F. Peng, H. Zou, Z.J.C.E.J. Liu, Revealing active-site structure of porous nitrogen-defected carbon nitride for highly effective photocatalytic hydrogen evolution, *Chem. Eng. J.*, 373 (2019) 687-699.
- [13] L. Zhang, Y. Zang, J. Ren, Y. Xue, J.J.I.J.o.H.E. Tian, Medium-entropy design boosts photocatalytic hydrogen production on g-C<sub>3</sub>N<sub>4</sub>, *Int. J. Hydrog. Energy*, 166 (2025) 151021.
- [14] Z.-x. Bi, R.-t. Guo, X.-y. Ji, X. Hu, J. Wang, X. Chen, W.-g.J.I.J.o.H.E. Pan, Direct Z-scheme CoS/g-C<sub>3</sub>N<sub>4</sub> heterojunction with NiS co-catalyst for efficient photocatalytic hydrogen generation, *Int. J. Hydrog. Energy*, 47 (2022) 34430-34443.
